# Supplementary material for: TGF-β Isoforms Affect the Planar and Subepithelial Fibrogenesis of Human Conjunctival Fibroblasts in Different Manners
Source: MDPI journal article supplement (doi:10.3390/biomedicines11072005), 2023-07-15
Supplement: s1 [file s1]

**Supplemental Table S1. Sequences of primers of qPCR**

| Sequence                      |         |                                                      | Exon<br>Location | RefSeq<br>Number |
|-------------------------------|---------|------------------------------------------------------|------------------|------------------|
| human<br>RPLP0 <sup>*1</sup>  | Probe   | 5'-/56-FAM/CCCTGTCTT/ZEN/CCCTGGGCATCAC/3IABkFQ/-3'   | 2-3              | NM_001002        |
|                               | Primer2 | 5'-TCGTCTTTAAACCCTGCGTG-3'                           |                  |                  |
|                               | Primer1 | 5'-TGTCTGCTCCCACAATGAAAC-3'                          |                  |                  |
| human<br>COL1A1 <sup>*1</sup> | Probe   | 5'-/56-FAM/TCGAGGGCC/ZEN/AAGACGAAGACATC/3IABkFQ/-3'  | 1-2              | NM_000088        |
|                               | Primer2 | 5'-GACATGTTTCAGCTTTGTGGAC-3'                         |                  |                  |
|                               | Primer1 | 5'-TTCTGTACGCAGGTGATTGG-3'                           |                  |                  |
| human<br>COL4A1 <sup>*1</sup> | Probe   | 5'-/56-FAM/TCATACAGA/ZEN/CTTGGCAGCGGCT/3IABkFQ/-3'   | 51-52            | NM_001845        |
|                               | Primer2 | 5'-AGAGAGGAGCGAGATGTTCA-3'                           |                  |                  |
|                               | Primer1 | 5'-TGAGTCAGGCTTCATTATGTTCT-3'                        |                  |                  |
| human<br>COL6A1 <sup>*1</sup> | Probe   | 5'-/56-FAM/CAGGTTTCG/ZEN/GTCACAGCGGTAGT/3IABkFQ/-3'  | 2-3              | NM_001848        |
|                               | Primer2 | 5'-CCTCGTGGACAAAGTCAAGT-3'                           |                  |                  |
|                               | Primer1 | 5'-GTGAGGCCTTGATGATCTC-3'                            |                  |                  |
| human<br>FN1 <sup>*1</sup>    | Probe   | 5'-/56-FAM/TACAGCTTA/ZEN/TTCTCCCTCGCCCAG/3IABkFQ/-3' | 3-4              | NM_212482        |
|                               | Primer2 | 5'-CGTCCTAAAGACTCCATGATCTG-3'                        |                  |                  |
|                               | Primer1 | 5'-ACCAATCTTGTAGGACTGACC-3'                          |                  |                  |
| human<br>αSMA <sup>*1</sup>   | Probe   | 5'-/56-FAM/AGACCCTGT/ZEN/TCCAGCCATCCTTC/3IABkFQ/-3'  | 8-9              | NM_001613        |
|                               | Primer2 | 5'-AGAGTTACGAGTTGCCTGATG-3'                          |                  |                  |
|                               | Primer1 | 5'-CTGTTGTAGGTGGTTTCATGGA-3'                         |                  |                  |
